# Supplementary material for: Molecular mechanism study of HGF/c-MET pathway activation and immune regulation for a tumor diagnosis model
Source: Springer Nature journal article supplement (doi:10.1186/s12935-021-02051-2), 2021-07-14

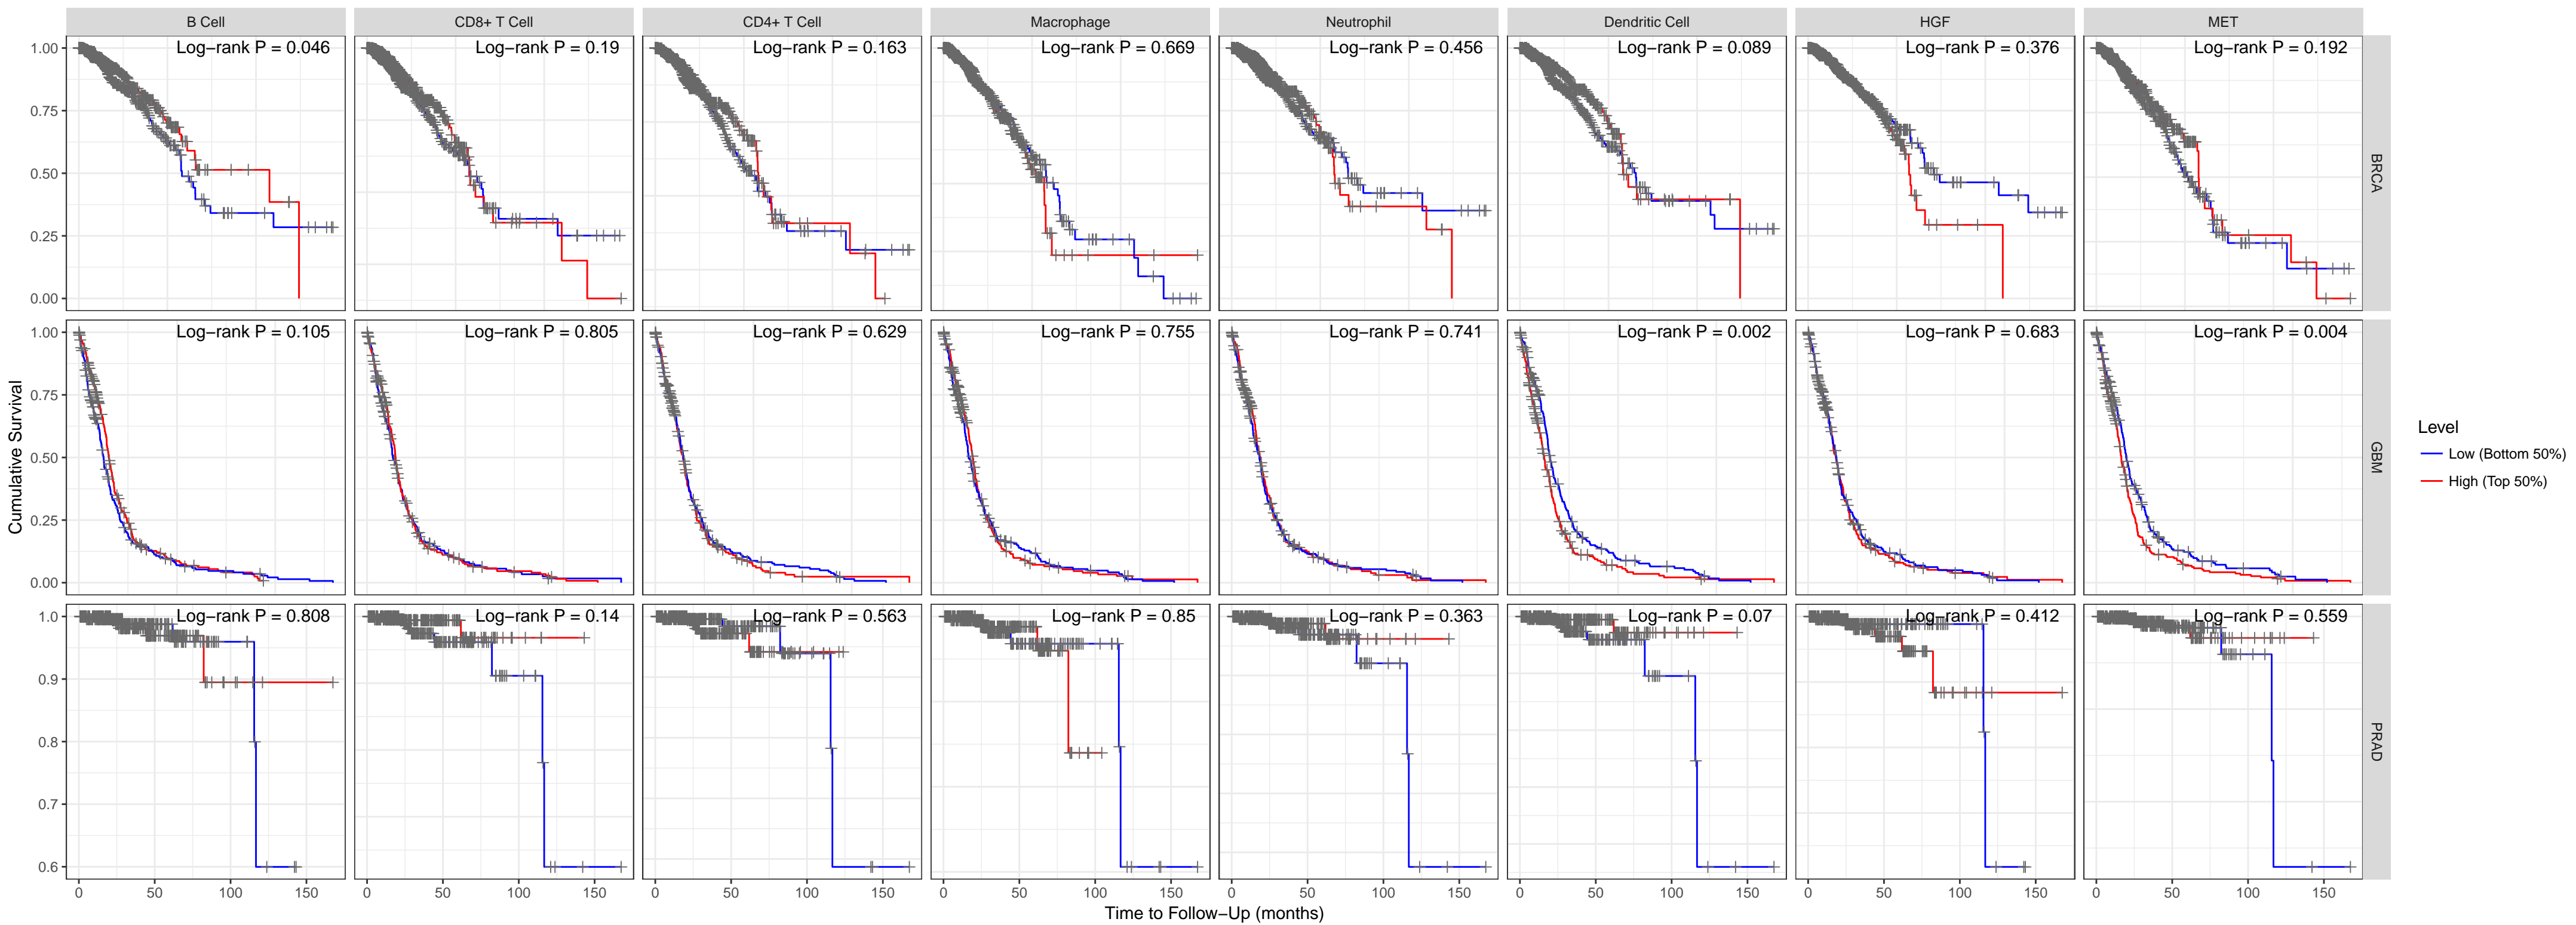

Supplement: MOESM3 [file 12935_2021_2051_MOESM3_ESM.pdf]
